# Supplementary material for: Mg(i)–Fe(–ii) and Mg(0)–Mg(i) covalent bonding in the MgnFe(CO)4− (n = 1, 2) anion complexes: an infrared photodissociation spectroscopic and theoretical study
Source: Royal Society of Chemistry journal article supplement (doi:10.1039/d2cp05719k), 2023-01-01
Supplement: d2cp05719k1.pdf [file d2cp05719k1.pdf]

## Supporting Information

### **Mg(I)-Fe(-II) and Mg(0)-Mg(I) Covalent Bonding in the $\text{Mg}_n\text{Fe}(\text{CO})_4^-$ ( $n = 1, 2$ ) Anion Complexes: An Infrared Photodissociation Spectroscopic and Theoretical Study**

Xiaoyang Jin, Guanjun Wang, Mingfei Zhou\*

Collaborative Innovation Center of Chemistry for Energy Materials, Department of Chemistry, Shanghai Key Laboratory of Molecular Catalysis and Innovative Materials,

Fudan University Shanghai 200438 (China). E-mail: mfzhou@fudan.edu.cn

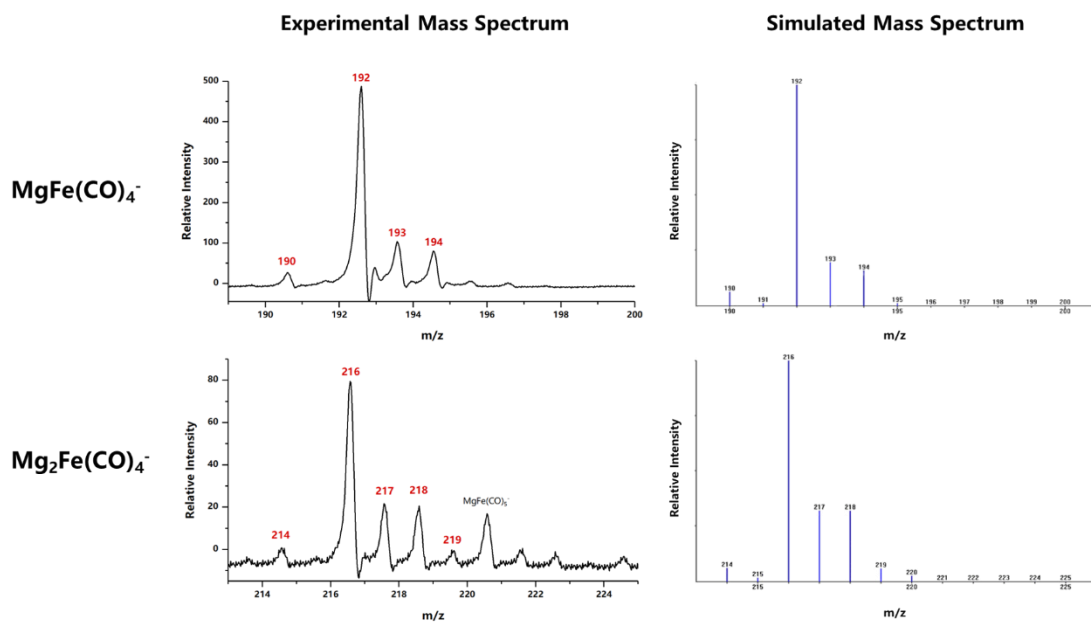

**Figure S1.** The experimental mass spectra of  $\text{MgFe(CO)}_4^-$  and  $\text{Mg}_2\text{Fe(CO)}_4^-$  and the corresponding simulated mass spectra based on natural isotope abundances of the elements. The number of Mg atoms can be confirmed according to the isotopic splitting.

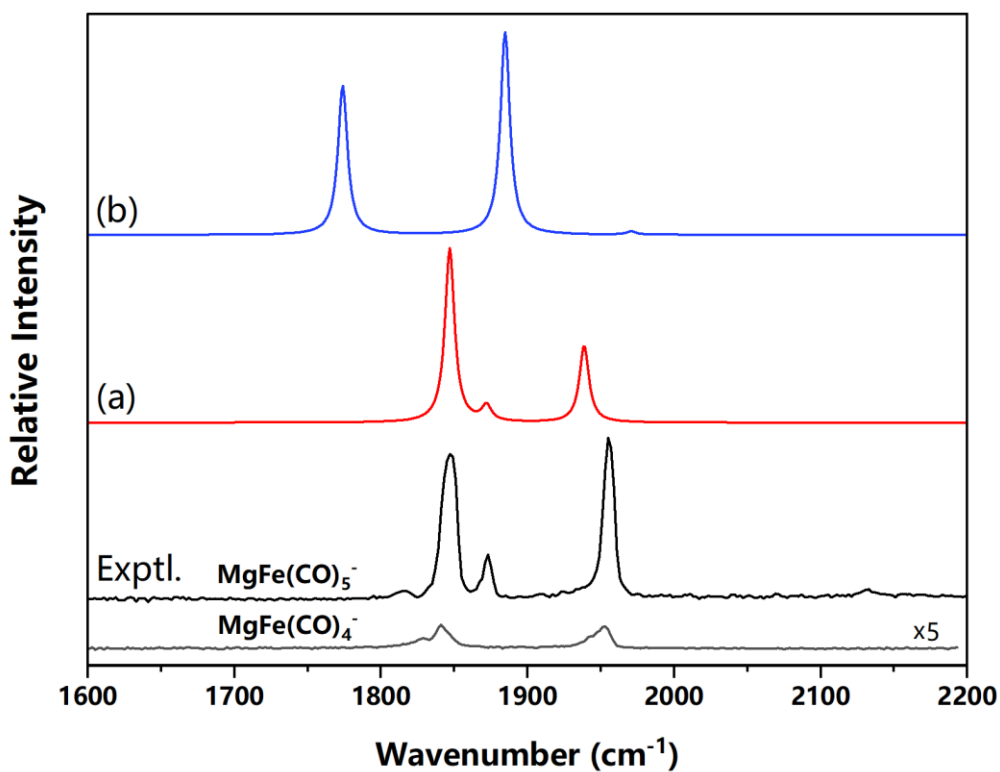

**Figure S2.** The experimental IR spectra of  $\text{MgFe}(\text{CO})_4^-$  and  $\text{MgFe}(\text{CO})_5^-$  and the simulated IR spectra of the two lowest-lying isomers (as shown in Table S1) of  $\text{MgFe}(\text{CO})_4^-$  at the B3LYP/aug-cc-pVTZ level. The predicted IR spectra were obtained from scaled harmonic vibrational frequencies for the two isomers of  $\text{MgFe}(\text{CO})_4^-$  by applying Lorentzian line shape function with  $4\text{ cm}^{-1}$  full-width-at-half-maximum.

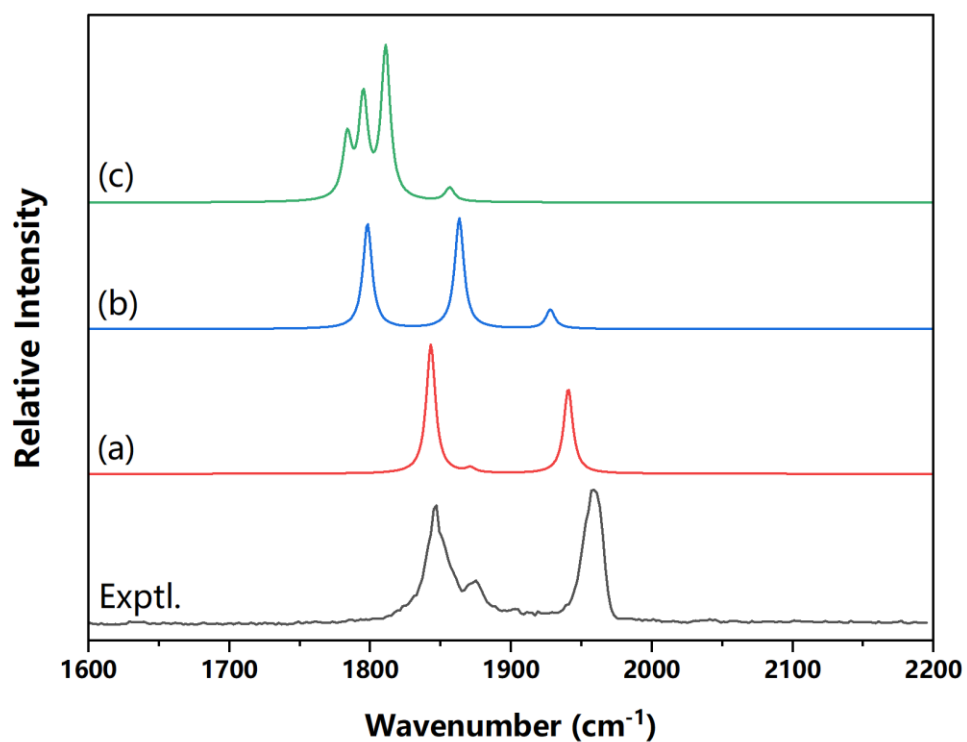

**Figure S3.** The experimental IR spectrum and the simulated IR spectra of the three lowest-lying isomers (as shown in Table S2) of  $\text{Mg}_2\text{Fe}(\text{CO})_4^-$  at the B3LYP/aug-cc-pVTZ level. The predicted IR spectra were obtained from scaled harmonic vibrational frequencies for the three isomers of  $\text{Mg}_2\text{Fe}(\text{CO})_4^-$  by applying Lorentzian line shape function with  $4\text{ cm}^{-1}$  full-width-at-half-maximum.

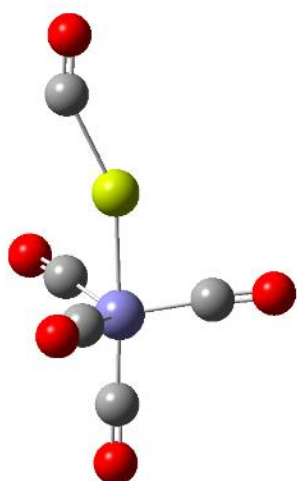

(a)  $C_1$ ,  $\Delta E = 0.0$

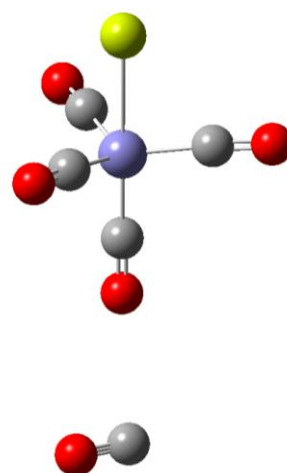

(b)  $C_1$ ,  $\Delta E = 5.4$

**Figure S4.** Optimized equilibrium geometries and relative energies ( $\text{kcal}\cdot\text{mol}^{-1}$ ) of different isomers of  $\text{MgFe}(\text{CO})_5^-$  in the doublet spin state at the B3LYP/aug-cc-pVTZ level of theory. Color codes for atoms: red, O; gray, C; purple, Fe; green, Mg.

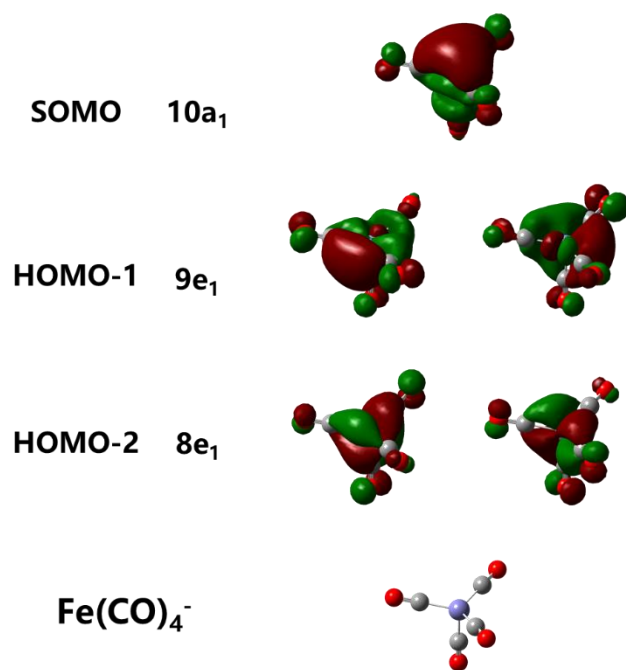

**Figure S5.** The contours of the frontier Kohn-Sham canonical valence MOs of the  $^2A_1$ - $\text{Fe}(\text{CO})_4^-$  at the B3LYP/aug-cc-pVTZ level (isosurface = 0.03 au.). Color codes for atoms: red, O; gray, C; purple, Fe.

**Table S1.** Calculated geometries and relative energies ( $\text{kcal}\cdot\text{mol}^{-1}$ ) of different isomers of  $\text{MgFe}(\text{CO})_4^-$  in the doublet spin state at the B3LYP/aug-cc-pVTZ level of theory. Color codes for atoms: red, O; gray, C; purple, Fe; green, Mg.

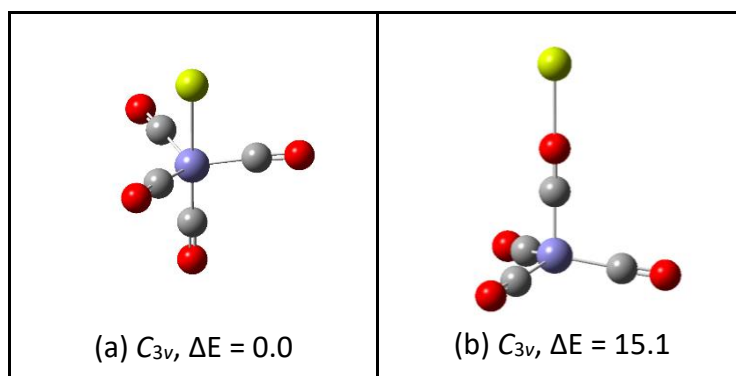

**Table S2.** Calculated geometries and relative energies ( $\text{kcal}\cdot\text{mol}^{-1}$ ) of different isomers of  $\text{Mg}_2\text{Fe}(\text{CO})_4^-$  in the doublet spin state at the B3LYP/aug-cc-pVTZ level of theory. Color codes for atoms: red, O; gray, C; purple, Fe; green, Mg.

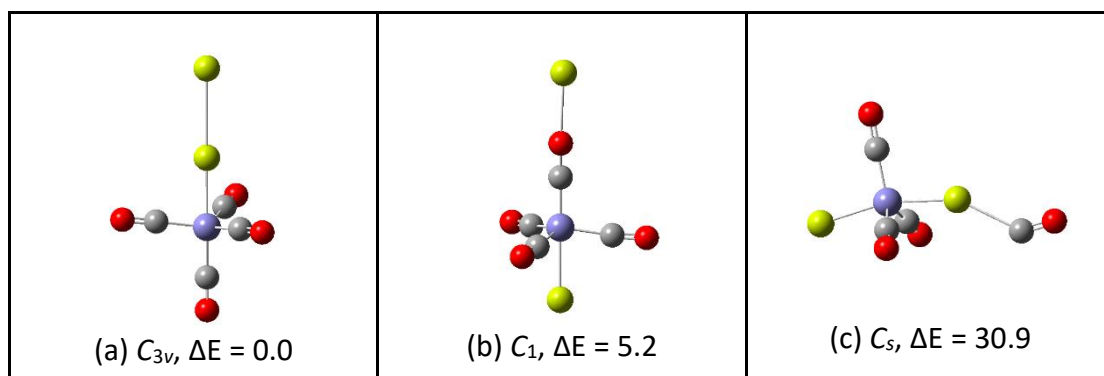



**Table S3.** Calculated bond dissociation energies  $D_0$  (kcal·mol<sup>-1</sup>) of MgFe(CO)<sub>4</sub><sup>-</sup>, MgFe(CO)<sub>5</sub><sup>-</sup> and Mg<sub>2</sub>Fe(CO)<sub>4</sub><sup>-</sup> for the loss of one magnesium atom or one carbon monoxide (the axial CO for MgFe(CO)<sub>4</sub><sup>-</sup> and Mg<sub>2</sub>Fe(CO)<sub>4</sub><sup>-</sup> and the tagging CO for MgFe(CO)<sub>5</sub><sup>-</sup>) at the B3LYP/aug-cc-pVTZ level of theory.

|                                                  | $D_0$ (-Mg) | $D_0$ (-CO) |
|--------------------------------------------------|-------------|-------------|
| MgFe(CO) <sub>4</sub> <sup>-</sup>               | 18.3        | 40.9        |
| MgFe(CO) <sub>5</sub> <sup>-</sup>               | 18.2        | 0.7         |
| Mg <sub>2</sub> Fe(CO) <sub>4</sub> <sup>-</sup> | 2.5         | 39.9        |

**Table S4.** Charge analyses of  ${}^2A_1$ -MgFe(CO) $_4^-$  with Hirshfeld, VDD, QTAIM and NPA at the B3LYP/aug-cc-pVTZ level.

| Atom | Spin density | Hirshfeld | VDD   | AIM   | NPA   |
|------|--------------|-----------|-------|-------|-------|
| Mg   | 0.55         | 0.04      | 0.04  | 0.52  | 0.47  |
| Fe   | 0.42         | -0.20     | -0.21 | 0.36  | -2.38 |
| C    | 0.00         | 0.00      | 0.01  | 0.73  | 0.76  |
| C    | 0.00         | 0.00      | 0.01  | 0.73  | 0.76  |
| C    | 0.00         | 0.00      | 0.01  | 0.73  | 0.76  |
| O    | 0.00         | -0.22     | -0.23 | -1.24 | -0.57 |
| O    | 0.00         | -0.22     | -0.23 | -1.24 | -0.57 |
| O    | 0.00         | -0.22     | -0.23 | -1.24 | -0.57 |
| C    | 0.07         | 0.04      | 0.06  | 0.89  | 0.87  |
| O    | -0.02        | -0.20     | -0.22 | -1.23 | -0.55 |

**Table S5.** Charge analyses of  ${}^2A_1\text{-Mg}_2\text{Fe}(\text{CO})_4^-$  with Hirshfeld, VDD, QTAIM and NPA at the B3LYP/aug-cc-pVTZ level.

| Atom                | Spin density | Hirshfeld | VDD   | AIM   | NPA   |
|---------------------|--------------|-----------|-------|-------|-------|
| Mg11 <sup>[a]</sup> | 0.31         | -0.17     | -0.17 | -0.11 | -0.02 |
| Mg8 <sup>[a]</sup>  | 0.22         | 0.22      | 0.22  | 0.69  | 0.49  |
| Fe                  | 0.48         | -0.20     | -0.22 | 0.32  | -2.41 |
| C                   | -0.01        | -0.01     | 0.01  | 0.71  | 0.77  |
| C                   | -0.01        | -0.01     | 0.00  | 0.72  | 0.77  |
| C                   | -0.01        | -0.01     | 0.00  | 0.72  | 0.77  |
| O                   | 0.00         | -0.22     | -0.23 | -1.24 | -0.56 |
| O                   | 0.00         | -0.22     | -0.23 | -1.24 | -0.56 |
| O                   | 0.00         | -0.22     | -0.23 | -1.24 | -0.56 |
| C                   | 0.05         | 0.04      | 0.06  | 0.88  | 0.88  |
| O                   | -0.02        | -0.20     | -0.22 | -1.21 | -0.55 |

[a] The number is referred to the atom label in Figure 3.

**Table S6.** AO contributions (in %) in Kohn-Sham MOs of  ${}^2A_1$ -MgFe(CO) $_4^-$  at the B3LYP/aug-cc-pVTZ level of theory.

|                         |   | Mg   |      |     | Fe   |      | CO   |
|-------------------------|---|------|------|-----|------|------|------|
|                         |   | 3s   | 3p   | 4s  | 3d   | 4p   | 2s2p |
| SOMO 11a <sub>1</sub>   | α | 45.9 | 19.0 | 0.7 | 13.7 | 6.9  | 11.4 |
| HOMO 9e <sub>1</sub>    | α |      | 1.3  |     | 48.7 | 12.7 | 35.1 |
|                         | β |      | 1.2  |     | 48.0 | 12.6 | 36.0 |
| HOMO-1 10a <sub>1</sub> | α | 34.7 | 0.1  | 0.3 | 24.4 | 14.1 | 23.2 |
|                         | β | 33.9 | 0.1  | 0.5 | 24.6 | 14.9 | 23.7 |
| HOMO-2 8e <sub>1</sub>  | α |      |      |     | 80.2 |      | 19.1 |
|                         | β |      |      |     | 79.1 |      | 20.2 |

**Table S7.** AO contributions (in %) in Kohn-Sham MOs of  ${}^2A_1\text{-Mg}_2\text{Fe}(\text{CO})_4^-$  at the B3LYP/aug-cc-pVTZ level of theory.

|                         |   | Mg8 <sup>[a]</sup> |      | Mg11 <sup>[a]</sup> |      | Fe  |      |      | CO   |
|-------------------------|---|--------------------|------|---------------------|------|-----|------|------|------|
|                         |   | 3s                 | 3p   | 3s                  | 3p   | 4s  | 3d   | 4p   | 2s2p |
| SOMO 12a <sub>1</sub>   | α | 26.8               | 12.3 | 15.8                | 23.6 | 0.3 | 8.1  | 4.3  | 6.3  |
| HOMO 9e <sub>1</sub>    | α |                    | 1.8  |                     |      |     | 48.1 | 12.5 | 35.5 |
|                         | β |                    | 1.7  |                     |      |     | 47.7 | 12.5 | 36.0 |
| HOMO-1 11a <sub>1</sub> | α | 4.8                | 1.5  | 31.3                | 0.9  | 0.5 | 24.1 | 13.7 | 21.2 |
|                         | β | 5.2                | 2.8  | 31.6                |      | 0.5 | 23.3 | 13.6 | 20.9 |
| HOMO-2 8e <sub>1</sub>  | α |                    |      |                     |      |     | 79.7 |      | 19.6 |
|                         | β |                    | 0.1  |                     |      |     | 79.0 |      | 20.3 |
| HOMO-3 10a <sub>1</sub> | α | 30.6               | 6.4  | 46.9                | 0.6  |     | 4.9  | 2.7  | 6.0  |
|                         | β | 27.7               | 5.1  | 48.4                | 1.1  |     | 5.8  | 3.4  | 6.7  |

[a] The number is referred to the atom label in Figure 3.

**Table S8.** The deformation densities  $\Delta\rho$  (red  $\rightarrow$  blue, isosurface = 0.001 au.) of  ${}^2A_1$ -MgFe(CO) $_4^-$  using Mg in the  ${}^3P$  ( $3s^13p^1$ ) excited state and Fe(CO) $_4^-$  in the  ${}^2A_1$  ground state as interaction fragments based on the EDA-NOCV analysis at the PBE/TZ2P level. Energy values are given in kcal·mol $^{-1}$ . The value in parentheses gives the percentage contribution to the total orbital interactions  $\Delta E_{\text{orb}}$ .

| Fragment                             | Mg: $3s^13p^1$<br>Fe(CO) $_4^-$ : ${}^2A_1$                                                                                                           |                                                                                                                                                     |                                                                                                                                                     |
|--------------------------------------|-------------------------------------------------------------------------------------------------------------------------------------------------------|-----------------------------------------------------------------------------------------------------------------------------------------------------|-----------------------------------------------------------------------------------------------------------------------------------------------------|
|                                      | $\alpha$                                                                                                                                              | $\beta$                                                                                                                                             | $\alpha+\beta$                                                                                                                                      |
| $\Delta E_{\text{orb}(\sigma)}$      | 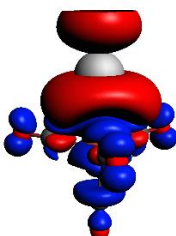<br>$\Delta E_{\sigma\alpha} = -76.3$<br>$ v_{\sigma\alpha}  = 0.75$ | <br>$\Delta E_{\sigma\beta} = -15.1$<br>$ v_{\sigma\beta}  = 0.47$ | <br>$\Delta E_{\sigma} = -91.4$ (88.9%)<br>$ v_{\sigma}  = 0.28$ |
| $\Delta E_{\text{orb}(\pi_1)}$       | <br>$\Delta E_{\pi_1\alpha} = -2.3$<br>$ v_{\pi_1\alpha}  = 0.11$  | <br>$\Delta E_{\pi_1\beta} = -1.8$<br>$ v_{\pi_1\beta}  = 0.11$  | <br>$\Delta E_{\pi_1} = -4.1$ (4.0%)<br>$ v_{\pi_1}  = 0.22$   |
| $\Delta E_{\text{orb}(\pi_2)}$       | <br>$\Delta E_{\pi_2\alpha} = -2.3$<br>$ v_{\pi_2\alpha}  = 0.11$  | <br>$\Delta E_{\pi_2\beta} = -1.8$<br>$ v_{\pi_2\beta}  = 0.11$  | <br>$\Delta E_{\pi_2} = -4.1$ (4.0%)<br>$ v_{\pi_2}  = 0.22$   |
| $\Delta E_{\text{orb}(\text{rest})}$ | -1.9                                                                                                                                                  | -1.3                                                                                                                                                | -3.2 (3.1%)                                                                                                                                         |

**Table S9.** The deformation densities  $\Delta\rho$  (red  $\rightarrow$  blue, isosurface = 0.001 au.) of  ${}^2A_1$ - $Mg_2Fe(CO)_4^-$  using Mg in the  ${}^3P$  ( $3s^13p^1$ ) excited state and  $MgFe(CO)_4^-$  in the  ${}^2A_1$  ground state as interaction fragments based on the EDA-NOCV analysis at the PBE/TZ2P level. Energy values are given in  $\text{kcal}\cdot\text{mol}^{-1}$ . The value in parentheses gives the percentage contribution to the total orbital interactions  $\Delta E_{\text{orb}}$ .

| Fragment                             | Mg: $3s^13p^1$<br>MgFe(CO) $_4^-$ : ${}^2A_1$                                                                                                         |                                                                                                                                                     |                                                                                                                                                     |
|--------------------------------------|-------------------------------------------------------------------------------------------------------------------------------------------------------|-----------------------------------------------------------------------------------------------------------------------------------------------------|-----------------------------------------------------------------------------------------------------------------------------------------------------|
|                                      | $\alpha$                                                                                                                                              | $\beta$                                                                                                                                             | $\alpha+\beta$                                                                                                                                      |
| $\Delta E_{\text{orb}(\sigma)}$      | 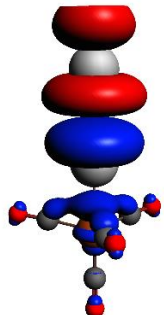<br>$\Delta E_{\sigma\alpha} = -15.9$<br>$ v_{\sigma\alpha}  = 0.53$ | <br>$\Delta E_{\sigma\beta} = -32.9$<br>$ v_{\sigma\beta}  = 0.70$ | <br>$\Delta E_{\sigma} = -48.8$ (95.3%)<br>$ v_{\sigma}  = 0.17$ |
| $\Delta E_{\text{orb}(\text{rest})}$ | -1.3                                                                                                                                                  | -1.1                                                                                                                                                | -2.4 (4.7%)                                                                                                                                         |
